# Supplementary material for: A Portable Stiffness Measurement System
Source: PubMed Central journal article supplement (PMC5712800; doi:10.3390/s17112686), 2017-11-21
Supplement: sensors-17-02686-s001.pdf [file sensors-17-02686-s001.pdf]

# A Portable Stiffness Measurement System

Onejae Sul <sup>1</sup>, Eunsuk Choi <sup>2</sup> and Seung-Beck Lee <sup>1,2,\*</sup>

<sup>1</sup> Institute of Nano Science and Technology, Hanyang University, 222 Wangsimni-ro, Seongdong-gu, Seoul 04763, Korea; ojsul@hanyang.ac.kr

<sup>2</sup> Department of Electronic Engineering, Hanyang University, 222 Wangsimni-ro, Seongdong-gu, Seoul 04763, Korea; silver77@hanyang.ac.kr

\* Correspondence: sbl22@hanyang.ac.kr; Tel.: +82-2-2220-1676; Fax: +82-2-2294-1676

Fit equation from the transposed curve in Figure 4(a):

$$y = 18.753 x^6 - 183.5918 x^5 + 73.22399 x^4 - 1502.83 x^3 + 1627.3419 x^2 - 803.6 x + 187.052$$

Here,  $y$  is the force in grams, and  $x$  is the f-module calibrator output in voltage. The dependent variable is set to force and independent variable is set to calibrator output, which are switched from the  $x$  and  $y$ -axes in Figure 4(a). This equation was used starting from f-module output to calculate the force applied on the f-module, in conjunction with the equation below.

Fit equation from Figure 4(b):

$$y = 0.00547116x^9 - 0.0358632x^8 + 0.00611468x^7 + 0.287445x^6 - 0.204121x^5 - 0.891349x^4 + 0.477689x^3 + 1.49812x^2 + 0.5555x - 0.00196643$$

Here,  $y$  is the f-module calibrator output in voltage, and  $x$  is the f-module output in voltage. Fit equation from Figure 5(b):

$$y = 41.0896x^3 - 219.40212x^2 + 389.66652x - 200.59051$$

Here,  $y$  is the force in grams, and  $x$  is the t-module calibrator output in voltage.

## Relationship between the IE Position and the Contact Force

The relationship between IE position  $d_i$  and contact force  $F$  can be obtained from Equation (4):

$$d_i = \frac{a}{\sin\left(\frac{\pi}{2}\left(1 - k_2\left(\frac{x_i}{F} - \frac{1}{k_1}\right)\right)\right)}$$

This equation is plotted in Figure S1. Considering the dimension of our system, the parameters of  $a$ ,  $x_i$ , and  $k_1$  are set as 3 mm, 6 mm, 2.7 N/mm<sup>2</sup>. The stiffness of soft and hard contact objects are assumed as 4 and 5 N/mm<sup>2</sup>, respectively. 0.79 N of contact force difference at 10 mm of IE position, becomes larger than 0.82 N at 20 mm. Thus better stiffness discrimination can be obtained by adjusting the t-module separation length.

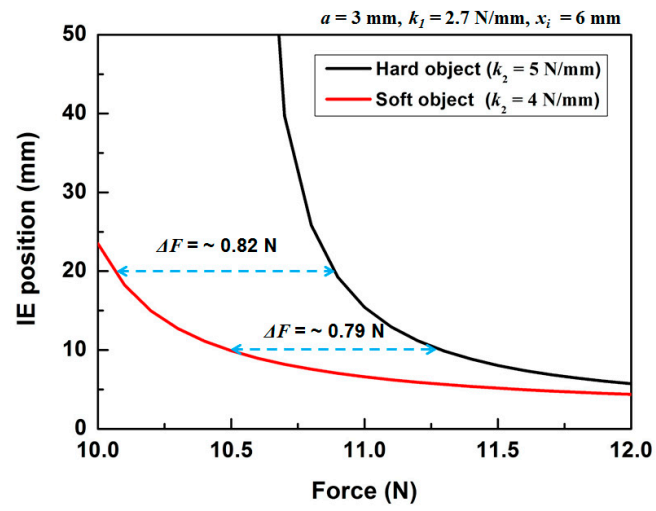

Figure S1. Theoretical distribution of the IE position depending on applied force.
